# Laminar microcircuitry of visual cortex producing attention-associated electric fields

Jacob A. Westerberg<sup>1,\*</sup>, Michelle S. Schall<sup>1</sup>, Alexander Maier<sup>1</sup>, Geoffrey F. Woodman<sup>1</sup>, and Jeffrey D. Schall<sup>2</sup>

<sup>1</sup>Department of Psychology, Center for Integrative and Cognitive Neuroscience, Vanderbilt Vision Research Center, Vanderbilt Brain Institute, Vanderbilt University, Nashville, Tennessee 37240, USA

<sup>2</sup>Centre for Vision Research, Vision: Science to Applications Program, Departments of Biology and Psychology, York University, Toronto, Ontario M3J 1P3, Canada

## ORCID:

J.A.W. – 0000-0001-5331-8707  
M.S.S. – 0000-0003-3631-5541  
A.M. – 0000-0002-7250-502X  
G.F.W. – 0000-0003-0946-9297  
J.D.S. – 0000-0002-5248-943X

**Corresponding Author:** \*Jacob A. Westerberg, [jacob.a.westerberg@vanderbilt.edu](mailto:jacob.a.westerberg@vanderbilt.edu), Department of Psychology, Vanderbilt University, Nashville, Tennessee 37240, USA

**Abstract:** Cognitive operations are widely studied by measuring electric fields through EEG and ECoG. However, despite their widespread use, the component neural circuitry giving rise to these signals remains unknown. Specifically, the functional architecture of cortical columns which results in attention-associated electric fields has not been explored. Here we detail the laminar cortical circuitry underlying an attention-associated electric field often measured over posterior regions of the brain in humans and monkeys. First, we identified visual cortical area V4 as one plausible contributor to this attention-associated electric field through inverse modeling of cranial EEG in macaque monkeys performing a visual attention task. Next, we performed laminar neurophysiological recordings on the prelunate gyrus and identified the electric-field-producing dipoles as synaptic activity in distinct cortical layers of area V4. Specifically, activation in the extragranular layers of cortex resulted in the generation of the attention-associated dipole. Feature selectivity of a given cortical column determined the overall contribution to this electric field. Columns selective for the attended feature contributed more to the electric field than columns selective for a different feature. Lastly, the laminar profile of synaptic activity generated by V4 was sufficient to produce an attention-associated signal measurable outside of the column. These findings suggest that the top-down recipient cortical layers produce an attention-associated electric field capable of being measured extracranially and the relative contribution of each column depends upon the underlying functional architecture.

**Key words:** CSD, ECoG, EEG, LFP, N2pc, V4

## 37 Introduction

38 Research into extracranial electric fields provides fundamental insights into the mechanisms of human perception,  
39 cognition, and intention. For instance, event-related potential (ERP) components like the N2pc (Luck and Hillyard,  
40 1994; Eimer, 1996; Woodman and Luck, 1999) and Pd (Hickey et al., 2009) reliably index selective attention in  
41 humans and monkeys, alike. However, the interpretation of these extracranial measures of attention is severely limited  
42 by uncertainty about the exact neural processes that generate these signals (Nunez and Srinivasan, 2006).  
43 Understanding what brain processes an electric field indicates requires knowing how it is generated (e.g., Cohen,  
44 2017).

45 One avenue to localize neural generators of electric fields is through inverse source localization (Michel et al.,  
46 2004; Grech et al., 2008). However, the results are indefinite and cannot offer conclusive answers. Moreover, these  
47 methods do not allow for the probing of the underlying neural circuitry. For example, most EEG signals are  
48 hypothesized to be generated by interlaminar interactions in cortical columns (Nunez and Srinivasan, 2006). Columnar  
49 microcircuits are ubiquitous across the brain (Douglas et al., 1989; Douglas et al., 1991 but see Godlove et al., 2014),  
50 having a well-defined anatomical structure (Mountcastle, 1997; Kaas, 2012) and consistent physiological activation  
51 pattern (Bastos et al., 2012). This canonical cortical microcircuitry allows for a framework in which to interpret columnar  
52 dynamics in sensory or cognitive tasks, yet the relationship between this functional architecture and electric fields  
53 related to cognition commonly measured in humans has yet to be explored.

54 Electric fields measured at the surface of the brain (ECoG) and scalp (EEG) are theorized to stem from dipoles  
55 in cortex. However, measuring current dipoles requires sampling electrical potentials across all the layers of the  
56 cerebral cortex. Such laminar neurophysiological measurements are rare and unsystematic in humans. Work in  
57 rodents has uncovered intriguing insights into cortical laminar microcircuits underlying evoked EEG signals, but all of  
58 these were limited to sensory responses (Jellema et al., 2004; Bruyns-Haylett et al., 2017; Næss et al., 2021).  
59 Fortunately, macaque monkeys produce homologues of the attention-associated EEG signals (N2pc: Woodman et al.  
60 2007; Cohen et al., 2009; Purcell et al., 2013; Pd: Cosman et al., 2018). Laminar neurophysiological measurements  
61 (Schroeder et al., 1998; Maier et al., 2010; Buffalo et al., 2011; Hansen et al., 2011; Self et al., 2013; Godlove et al.,  
62 2014; Engel et al., 2016; Klein et al., 2016; Hembrook-Short et al., 2017; Nandy et al., 2017; Trautmann et al., 2019;  
63 Westerberg et al., 2019; Tovar et al., 2020; Ferro et al., 2021) and EEG (Schmid et al., 2006; Woodman et al., 2007;  
64 Sandhaeger et al., 2019) are well established in macaques. However, despite many studies linking intra- and  
65 extracranial signals (Schroeder and Givre, 1992; Whittingstall and Logothetis, 2009; Musall et al., 2014; Snyder and  
66 Smith, 2015), to date, little is known about the laminar origins of ERPs in primates.

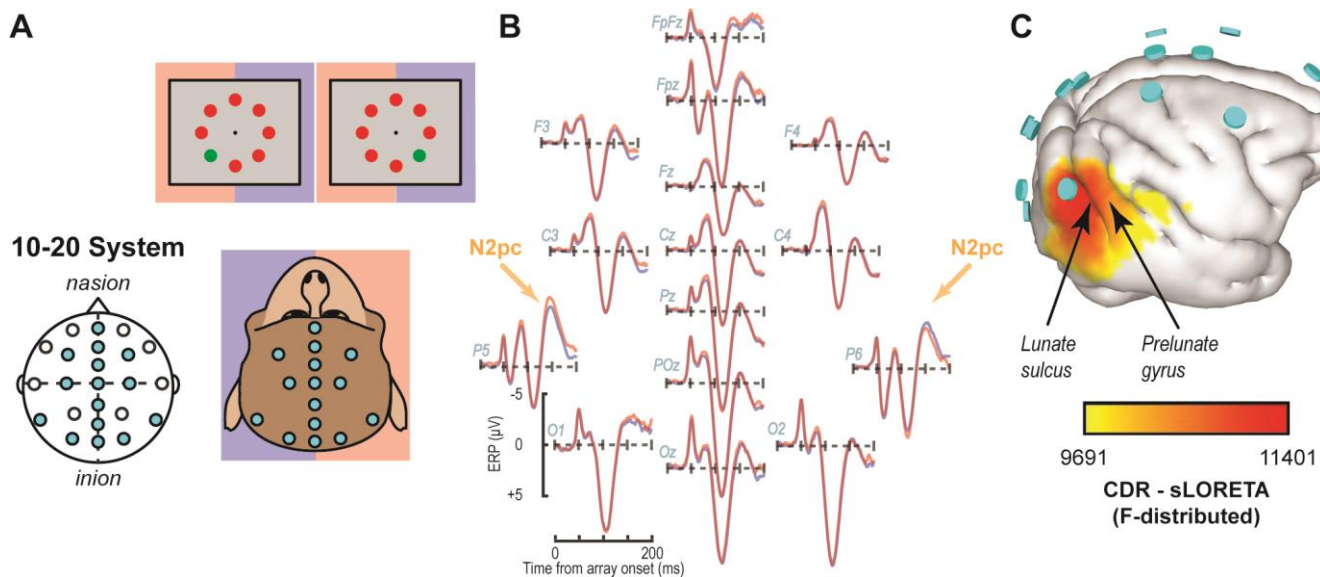

**Figure 1.** EEG traces and inverse source localization for the N2pc index of attention in monkeys. (A) EEG was recorded from electrodes arranged according to the 10-20 system in monkeys performing visual search for a colored oddball stimulus (see monitor diagrams showing two example search arrays in top panels). Blue and red shading indicates the relationship between visual hemifields and cerebral hemispheres to highlight the mapping between lateralized EEG signals and target location. (B) Trial-averaged EEG traces from monkey Z following presentation of search arrays with the target in either the right (blue) or left (red) visual hemifield. The voltage differential that characterizes the N2pc arises ~150 ms after array presentation for the target in the left vs. right visual fields (orange arrows). The N2pc was significant at posterior sites P5 and P6 (dependent samples t test between response polarizations averaged between 125-250 ms following array onset for contralateral and ipsilateral target presentations ( $t(35) = 2.42$ ,  $p = 0.02$ )). (C) Inverse solution using sLORETA to determine current distribution consistent with voltage distribution during the N2pc (113-182 ms) when the target was in the left hemifield. Current density is displayed over the 3D boundary element model derived from a magnetic resonance scan of monkey Z. Data was clipped below the 85% maximum value for display purposes. Cyan disks indicate EEG electrode positions. Current density is concentrated beneath electrode P6 caudal to the lunate sulcus and in area V4 on the prelunate gyrus. Both results in B and C are reproduced for a second monkey in Figure S1.

**Figure 2.** Extracranial attention-associated signal and simultaneously recorded V4 synaptic currents during representative session. (A) Extracranial ERPs as voltages aligned to array onset, averaged over all trials when the target was presented contra- (solid) or ipsilateral (dashed) to the electrode. Inset magnifies the N2pc window, highlighted in orange, defined as the difference in potentials 150–190 ms following array onset. (B) Cortical (laminar) current source density (CSD), aligned on array presentation when the target appeared in the population receptive field of the column. Dashed lines delineate estimated boundaries between supragranular (L2/3), granular (L4), and infragranular (L5/6) layers. CSD values were interpolated and smoothed along depth for display only. Current sinks are indicated by hotter hues and current sources by cooler hues, respectively. The earliest sink arises in putative L4, likely from rapid feedforward transmission. (C) CSD evoked by target outside the receptive field. (D) Subtraction of CSD responses shown in B and C. The only statistically significant differences (determined through a t test across time with  $p < 0.05$ , outlined by magenta line) were due to a current sink in L2/3 that arose gradually ~100 ms after array presentation. This relative sink was associated with a weak relative source in L5/6. (E) Mutual information between CSD and the extracranial signal for L2/3 (blue), L4 (purple), and L5/6 (green), aligned on array onset. Timepoints with significant mutual information were computed through Monte Carlo shuffle simulations (MCS). Epochs with significant mutual information persisting for at least 10 ms are indicated by horizontal bars. No such epochs were observed in L4. Highlighted region indicates period of N2pc. (F) Information transmission about target position from V4 CSD to the extracranial signal. Conventions as in E.

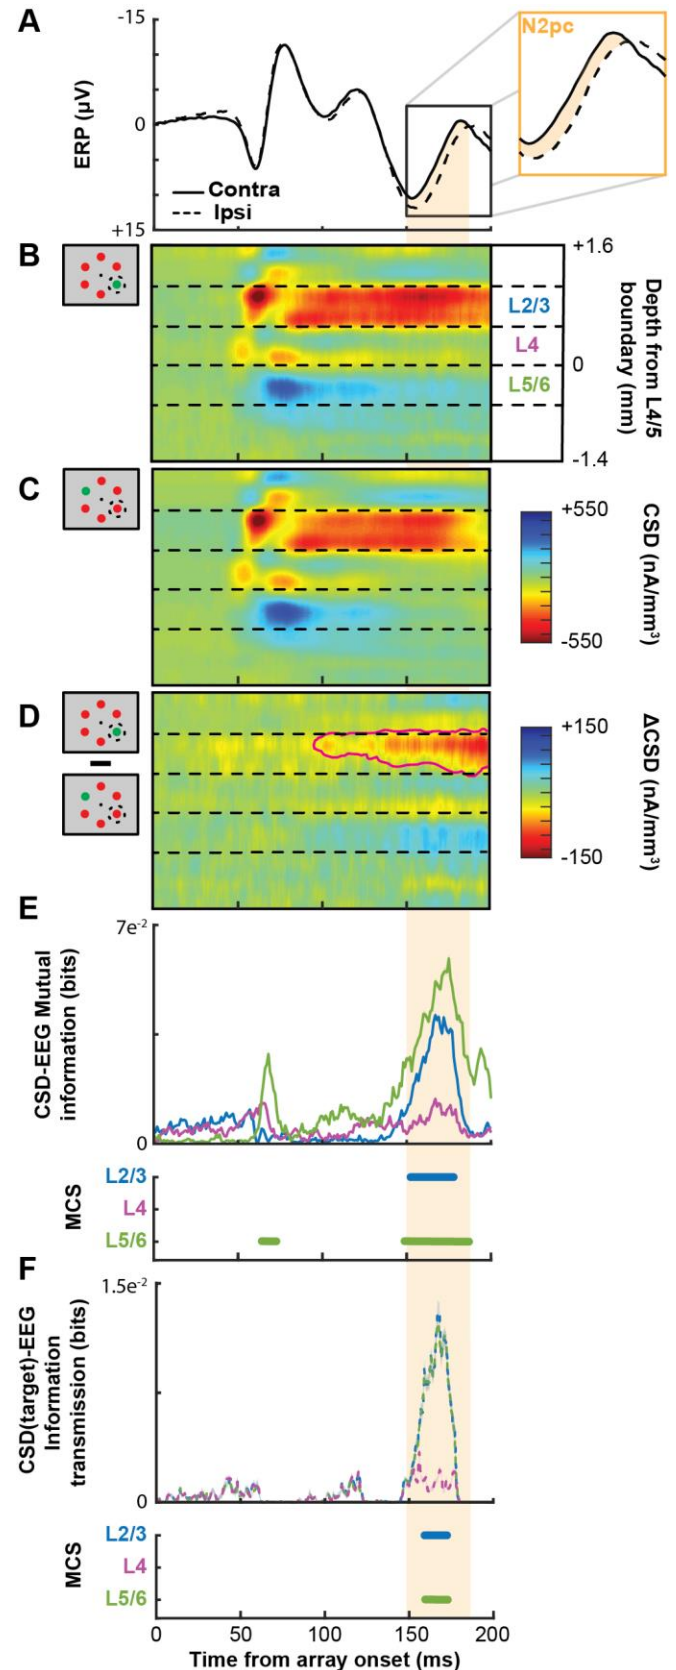

67 Here we show that visual cortex generates dipoles  
 68 through layer-specific transsynaptic currents that give rise to  
 69 electric fields that track the deployment of selective attention.  
 70 These dipoles were generated by the extragranular  
 71 compartments of cortex – indicating these cognitive  
 72 operations likely arise from top-down interactions. Moreover,  
 73 functional architecture – in the form of feature columns – were  
 74 associated with the relative contribution of individual, local  
 75 cortical columns to the global electric field. These results are  
 76 the first to our knowledge to describe laminar specificity in  
 77 synaptic activations contributing to the generation of electric  
 78 fields associated with cognitive processing.

## Results

### Attention task

82 To investigate extracranial manifestations of attention-  
 83 associated electric fields, we first trained macaque monkeys  
 84 to perform a visual search task (Figure 1A). Three macaque  
 85 monkeys (designated Ca, He, and Z) performed visual search  
 86 for an oddball color target (red or green), presented within an  
 87 array of 5 or 7 uniform distractors (green or red) (N sessions:  
 88 monkeys Ca, 21; He, 9; Z, 18). A fourth monkey (P)  
 89 performed visual search for an oddball shape (T or L)  
 90 presented within an array of up to 7 uniform distractors (L or  
 91 T) (N sessions: monkey P, 22). Each animal performed well  
 92 above chance [chance level for monkeys Ca, He: 16.6%; P,  
 93 Z: 12.5%] (behavioral accuracy in color search: monkeys Ca,  
 94 88%; He, 81%; Z, 85%; accuracy in shape search: monkey P,  
 95 66%). We used a color pop-out search in our initial recordings  
 96 so that we could be certain of which item received the benefit  
 97 of attention in the array, and we used the more difficult search  
 98 data determine the generality of our findings.

### Inverse modeling of attention-associated extracranial electric fields points to visual cortex

100 Once animals could successfully perform visual search, we implanted an array of electrodes approximating the human  
 101 10-20 system in monkeys P and Z (Figure 1A). Using these electrodes, we observed extracranial electric dynamics in  
 102



103 both monkeys. An index of attention known as the N2pc  
104 manifests during visual search. The N2pc served as our  
105 representative attention-associated electric field indicating  
106 attention in this task. The magnitude of the N2pc was largest  
107 over occipital sites (Figure 1B, S1), consistent with previous  
108 reports in humans and macaques (Luck and Hillyard, 1994;  
109 Eimer, 1996; Woodman and Luck, 1999; Hopf et al., 2000;  
110 Woodman et al., 2007; Cohen et al., 2009; Purcell et al.,  
111 2013). Next, we used sLORETA inverse modeling for source  
112 localization. Previous source estimates for the N2pc identified  
113 the human homologue of V4 (Luck and Hillyard, 1990, 1994;  
114 Hopf et al., 2000). These findings are consistent with  
115 numerous reports that areas in mid-level visual cortex in  
116 monkeys produce robust attention signals (Moran and  
117 Desimone, 1985; Luck et al., 1997; McAdams and Maunsell,  
118 1999; Reynolds et al., 1999; Fries et al., 2001; see Roe et al.,  
119 2012 for review) across cortical layers (Engel et al., 2016;  
120 Nandy et al., 2017). In line with these earlier studies, our  
121 inverse models showed that current sources include V4 on the  
122 prelunate gyrus (Figure 1C, S1). However, the modeled  
123 current sources also included other cortical regions, as is  
124 common for inverse solutions. Notably, the inverse solution  
125 identifies V1 to be about as strong as V4 in contributing to the  
126 N2pc, which is unlikely given current knowledge on attentional  
127 modulation for each area (Motter, 1993; Luck et al., 1997;  
128 Kastner et al., 1999; Buffalo et al., 2010). Given the primary  
129 feature used in the search task was color, we decided to  
130 investigate the laminar profile of attention-associated electric  
131 field generation in V4 where color is better represented (Roe  
132 et al., 2012).

### 134 V4's laminar microcircuit produces dipoles that predict the 135 attention-associated electric field

136 Guided by magnetic resonance imaging, linear electrode  
137 arrays (LMAs) were inserted into area V4 of two monkeys,  
138 Ca and He. LMAs were placed perpendicular to the cortical  
139 surface, spanning supragranular (L2/3), granular (L4), and  
140 infragranular (L5/6) cortical layers. Simultaneously, an  
141 extracranial electric signal was recorded immediately above  
142 V4 – critically the recording took place outside of the cortical  
143 column itself. Current source density (CSD) was derived  
144 from the local field potentials (LFPs) sampled across V4 layers. To relate the extracranial signal (Figure 2A) to synaptic  
145 currents estimated as CSD (Figure 2B-D), we employed information theory to capture multivariate factors and  
146 nonlinearities between signals (Shannon, 1948; Cover and Thomas, 2006). Importantly, information theory analyses  
147 are model independent (Timme and Lapish, 2018). Information theory thus is superior to standard linear models since  
148 these models cannot capture all potential relationships between signals. The relationship between the extracranial  
149 signal and CSD were assessed in four discrete steps, as illustrated by a representative session (Figure 2E-F, S2).  
150 Again, we use the time period of the purported N2pc as our primary focus for determining whether V4's laminar  
151 circuitry is involved in the production of attention-associated electric fields.

152 First, we employed Monte Carlo simulations of the mutual information analysis to verify that the extracranial  
153 signal exhibits significantly enhanced information about target position during the time window of the N2pc (Figure S2).  
154 Second, we measured target information across the layers of V4 during the N2pc temporal window. This analysis  
155 revealed enhanced information in L2/3 and L5/6 but not in L4 (Figure S2). Third, we computed the mutual information  
156 between the extracranial signal and CSD during the N2pc window, irrespective of target position. This analysis showed  
157 a significant relationship between extracranial signal and the CSD in L2/3 and L5/6 but not in L4 (Figure 2E, S2).  
158 Fourth, we measured the transmitted information about target location from CSD to extracranial signal during the N2pc  
159 window (Timme and Lapish, 2018). This analysis demonstrated significant information transmission to the extracranial  
160 signal from L2/3 and L5/6, but not L4 (Figure 2F, S2).

161 Averaged across sessions, we observed that the attention-associated electric field during the N2pc window  
162 (Figure 3A) was associated with a consistent CSD pattern (Figure 3B). This relationship was observable in each

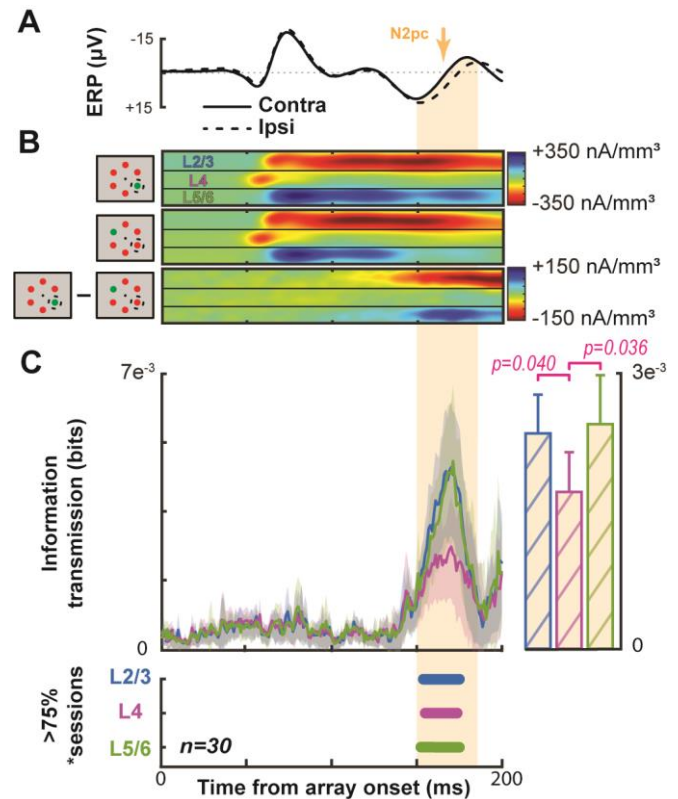

**Figure 3.** Grand average demonstrating the link between V4 CSD and the extracranial attention-associated electric field. Conventions as in Figure 2. (A) Average ERP across all sessions and animals with the target contra- (solid) or ipsilateral (dashed). The N2pc interval is indicated by orange shading. (B) Average V4 CSD with the target in (top) or out of the RF (center) with the difference between the two at the bottom. (C) Grand average information transmission about target position from V4 layers to the extracranial signal as a function of time (left). Average  $\pm 2$  SEM of information transmission during the N2pc window (right). Panel below shows that Information transmission from L2/3 and in L5/6 was significantly greater than that from L4 (t test  $p < 0.05$ ). Timepoints with significant information transmission were assessed through Monte Carlo simulations during  $>75\%$  of sessions. Epochs with significance persisting for at least 10 ms are indicated by horizontal bars, color coded for each laminar compartment (bottom).

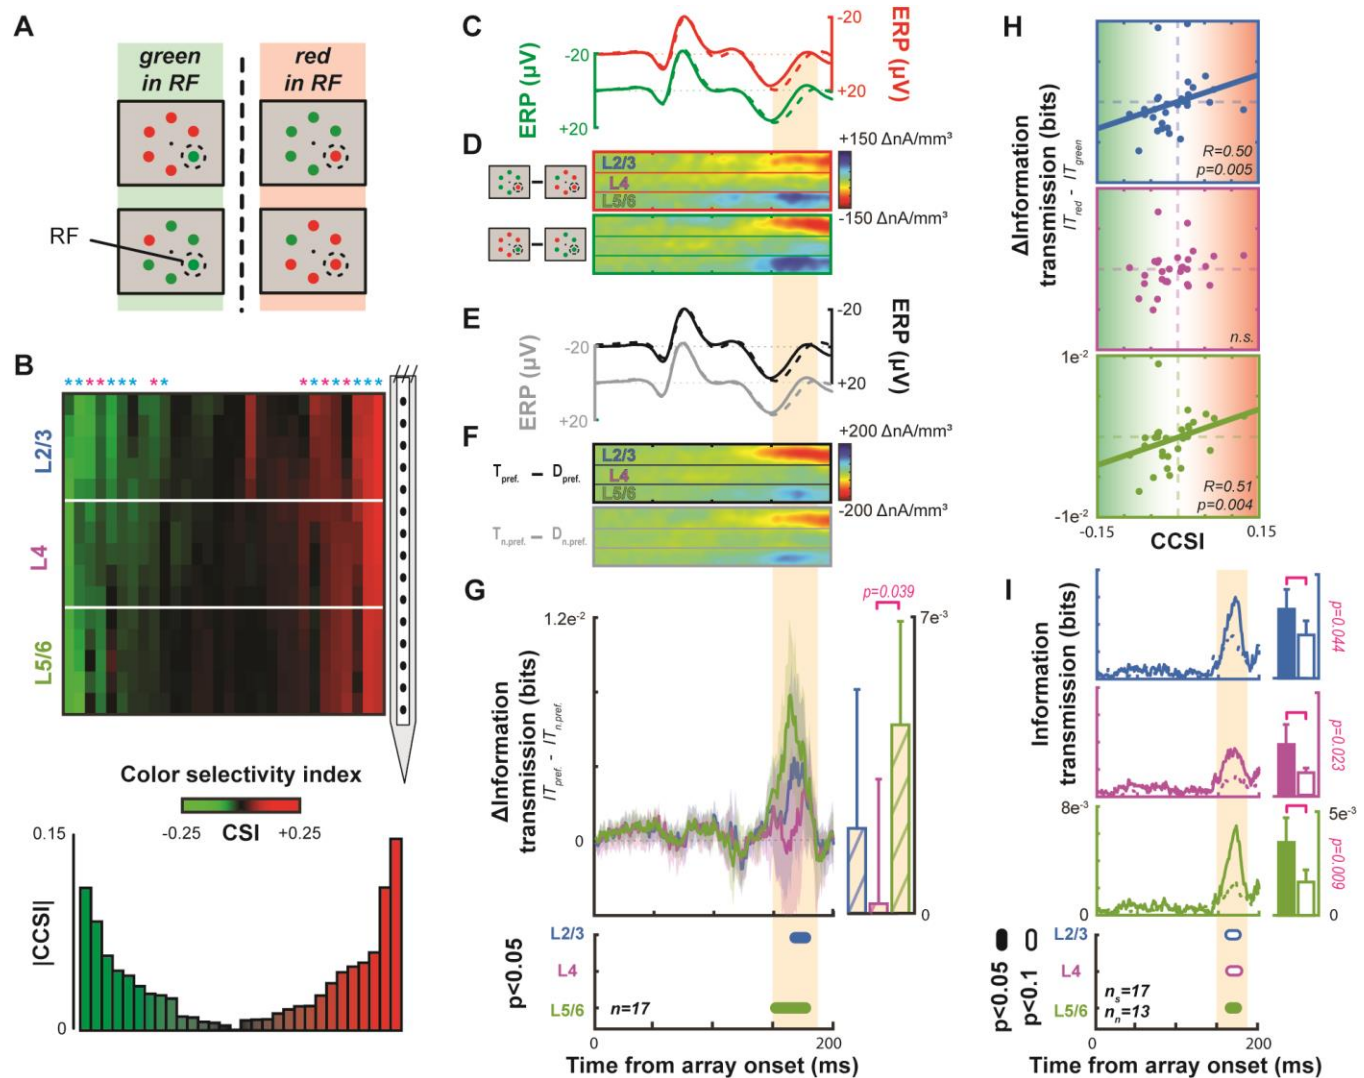

**Figure 4.** Contribution of columnar feature selectivity to the attention-associated electric field. Conventions as in Figure 2. (A) Visual search array configurations used for color selectivity analyses. (B) Laminar profiles of red/green color selectivity across all sessions. The hue of each point across cortical depth signifies the value of a color selectivity index (CSI), derived from local gamma power. CSI values  $<0$  indicate preference for green, and values  $>0$ , preference for red. CSI is smoothed across 2 adjacent channels for display only. Sessions are sorted from left to right based on a second index that estimates each column's combined selectivity, termed column color selectivity index (CCSI). A bar plot representing each session's CCSI is plotted below. Asterisks indicate columns that were significantly color-selective (Wilcoxon sign rank,  $p < 0.05$ ). Asterisk color indicates which monkey the column was recorded from (monkey Ca: cyan; He: magenta). (C) Average ERPs for trials when a red (top) or green (bottom) target or distractor appeared in the RF based on the 17 significantly color selective columns. Conventions as in Figure 2. (D) Difference in CSD when the target appeared within the columnar population receptive field (RF), compared to out-of-RF trials when a red (top) or green (bottom) target or distractor appeared in the RF ( $n = 17$ ). (E) Average ERP for trials when the preferred color (top) or non-preferred color (bottom) target or distractor appeared in the RF for the 17 color selective columns. Conventions as in Figure 2. (F) Difference in CSD when the target was within vs. out of the RF, for trials when the preferred color (top) or non-preferred color (bottom) target or distractor appeared in the RF. (G) Average across color-selective columns for subtraction of information transmission from laminar CSD to the extracranial signal about non-preferred color target position from information transmission about preferred color target position. Conventions as before. L2/3 and L5/6 but not L4 contribute significantly to the extracranial signal. (H) Correlation plots between the CCSI for each session and the difference in information transmission between the red and green stimulus conditions for L2/3 (blue, top), L4 (purple, center), and L5/6 (green, bottom). Spearman correlation reported in lower righthand corner of each plot. Data from all 30 sessions included. (I) Comparison of feature selective (solid line,  $n_s = 17$ ) and non-feature-selective (dashed line,  $n_n = 13$ ) columns for each laminar compartment (L2/3: blue, top; L4: purple, upper middle; L5/6: green, lower middle). Differences in time are shown at the bottom for each compartment at two alpha levels (filled: 0.05; unfilled: 0.1) as computed by a two-sample t test. Average information transmission during the time of N2pc indicated with bars at right with upper limit of 95% confidence intervals (left bars, selective columns; right bars, non-selective columns). Significance is indicated with a magenta bracket and p value from a two-sample t test shown to the right of ordinate.

163  
164  
165  
166  
167  
168

monkey (Figure S3A-B). Presentation of the search array in any configuration elicited an early current sink in L4, followed by a prolonged sink in L2/3 that was associated with a briefer source in L5/6.

We next computed information transmission about target location from the CSD to extracranial signal for each session (Figure 3C). All cortical layers provided significant information transmission in  $>75\%$  of sessions during the N2pc window (150-190 ms following array onset). However, the magnitude of transmitted target information was significantly greater in L2/3 and L5/6 relative to L4 (L2/3-L4:  $t(29) = 2.15$ ,  $p = 0.040$ ; L5/6-L4:  $t(29) = 2.20$ ,  $p = 0.036$ ).

169 The magnitude of information transmission was not significantly different between L2/3 and L5/6 ( $t(29) = 0.21$ ,  $p =$   
170  $0.84$ ).

171 Across sessions, the three other information theoretic analyses were consistent with the example session  
172 (Figure S2). Significant information transmission during the time of the N2pc was observed in each monkey (Figure  
173 S3C). Thus, the current dipole in V4 generated by the L2/3 CSD sink and the L5/6 CSD source contributes to the N2pc  
174 measured in the overlying extracranial electric field.

### 176 *Feature selectivity determines columns' relative roles for attention-associated electric field generation*

177 Given the selectivity of V4 neurons for color (Figure 4A) (Roe et al. 2012) and the homogenous columnar  
178 representation of V4 color selectivity (Zeki, 1973, 1980; Tootell et al., 2004; Conway and Tsao, 2009; Kotake et al.,  
179 2009), we next investigated the role of columnar color tuning for the contribution of that column to the attention-  
180 associated electric field. To quantify color selectivity through depth, we computed the response ratio between red and  
181 green stimuli (Figure 4B). Responses were measured as power in the gamma range (30-150 Hz) because this activity  
182 reflects local circuit interactions (Ray and Maunsell, 2011) as well as feature selectivity in visual cortex (Berens et al.,  
183 2008) and is more reliably measured across all LMA contacts than spiking activity.

184 To identify columns with significant selectivity for either red or green, we performed Wilcoxon sign rank tests  
185 between the distribution of ratios in each column against bootstrapped null distributions. Each bootstrapped null  
186 distribution contained 15 randomly selected ratios from the full dataset (450 experimental values). 1000 such  
187 distributions were generated to be tested against. The bootstrapped distributions represent the range of possible  
188 values observed across V4, but do not capture any difference in the homogeneity of feature selectivity within a column.

189 We found that more than half of V4 columns (monkey Ca: 12/21, 57.1%; He: 5/9, 55.6%) show color selectivity  
190 defined in this way. We computed the information transmission of target position for each of these color tuned  
191 columns. We first computed this value for trials where the preferred color was in the column's population receptive  
192 field. Then, we recomputed this value for trials with the non-preferred color. Note that the amplitude of the extracranial  
193 signal during the N2pc window did not differ across sessions with different target and distractor colors (paired sample  
194  $t(16) = 0.40$ ,  $p = 0.69$ ) (Figure 4C), nor did the laminar CSD

195 during the same window (L2/3:  $t(16) = -0.85$ ,  $p = 0.41$ ; L4:  
196  $t(16) = 0.75$ ,  $p = 0.46$ ; L5/6:  $t(16) = 0.36$ ,  $p = 0.72$ ) (Figure  
197 4D). However, we found that the information transmitted  
198 during the N2pc window was greater when a preferred  
199 rather than a nonpreferred color was present (Figure 4G).  
200 This difference was significant in L2/3 and L5/6 but not in  
201 L4 (t test across time with at least 10 ms having  $p < 0.05$ ),  
202 and can clearly be seen at the single session level (Figure  
203 S4).

204 We investigated whether the degree of color  
205 preference was related to information transmission. We  
206 plotted the columnar color preference as an index (CCSI:  
207 positive, red-preferring; negative, green-preferring) against  
208 the difference in information transmission between  
209 conditions (red – green) around the time of peak  
210 information transmission (160-180 ms) for each session  
211 (Figure 4H). Computing Spearman's  $r$  for each laminar  
212 compartment, we found a significant relationship between  
213 the magnitude of feature selectivity and the difference in  
214 information transmission for L2/3 ( $R = 0.50$ ,  $p = 0.005$ ) and  
215 L5/6 ( $R = 0.51$ ,  $p = 0.004$ ).

216 In a similar vein, we tested whether feature  
217 selective columns, on average, transmitted more  
218 information than their non-feature-selective counterparts.  
219 We found that feature selective columns, along all laminar  
220 compartments, transmitted significantly more information  
221 (Figure 4I) (two-sample t test: L2/3,  $p = 0.044$ ; L4,  $p =$   
222  $0.023$ ; L5/6,  $p = 0.009$ ). Together these findings suggest  
223 that visual cortical columns contribute more to the overlying  
224 attention-associated electric field when the item in their  
225 receptive field matches their tuning preference.

### 227 *Translaminar currents in V4 recapitulate the N2pc*

228 CSD is computed by differentiating between local field  
229 potentials to eliminate volume conducted signals that do

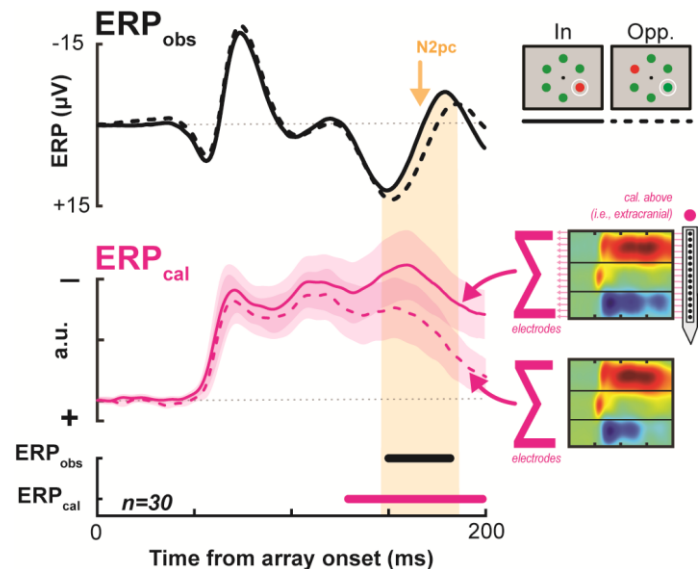

**Figure 5.** Comparing an estimated field potential generated from the CSD across the cortical columns to the actually observed extracranial event-related potential. Black lines indicate the empirically measured event-related potential ( $ERP_{obs}$ , top), averaged across sessions. The pink line indicates the estimated event-related potential calculated from the synaptic currents across V4 columns, averaged across sessions ( $ERP_{cal}$ , center). Synaptic currents at each electrode are measured and divided by the Euclidean distance of the electrode from the extracranial surface (see Methods; Nicholson and Llinas 1971; Kajikawa and Schroeder 2011). ERP for target present in the RF vs. target opposite the RF is shown as solid and dashed lines, respectively (example array for each condition shown at top right). Clouds around  $ERP_{cal}$  lines indicate 95% confidence intervals across sessions for each condition. Note that despite differences in overall wavelshape (which are likely due to the fact that V4 is not the only contributor to the attention-independent, visually evoked ERP), the timing of differences within signal types can be compared. The congruence in polarization of the difference in potentials is of similar note.



not arise from local circuit activity. Using the inverse procedure (i.e., summing the CSD), it is possible to estimate the local field potential without contamination by volume conducted activity (Nicholson and Llinas, 1971; Kajikawa and Schroeder, 2011). We used this logic to compute an estimated extracranial event-related potential (ERP). Specifically, we computed the sum of currents produced by a cortical column to estimate the extracranial signal at a position directly above. The resultant potential ( $ERP_{cal}$ ) showed a significant difference that persisted throughout the time period of the N2pc (Figure 5). In other words, the summed potential generated by currents along V4 columns differentiates between attention conditions simultaneous with the extracranially measured attention-associated signal. Note that the shape of the empirically observed extracranial ERP ( $ERP_{obs}$ ) differs from the estimated extracranial  $ERP_{cal}$ . This is expected in part because the  $ERP_{obs}$  reflects several more variables such as volume conducted contributions of nearby columns as well as the filtering and attenuating effects of the tissue and cranium above the gray matter (Nunez and Srinivasan, 2006). Given these expected differences, it is remarkable how well the difference in  $ERP_{cal}$  predicts the timing of the attention-associated electric field.

## Discussion

Bioelectric potentials have practical and clinical applications when their generators are known. For example, the electrocardiogram is useful in medicine because the physiological process associated with each phase of polarization is understood. Likewise, the electroretinogram is useful because the cell layers associated with each polarization are understood. In contrast, human ERP components indexing cognitive operations will have limited utility until their neural generators are known.

The ERP indices of attention such as the N2pc or Pd are commonly used to assess the deployment of attention in human participants, but can also be observed in macaque monkeys, enabling systematic concurrent EEG and intracranial neurophysiological recordings. Our objective was to identify the neural generator of the attention-associated electric fields that comprise ERPs like the N2pc. Using inverse modeling of cranial surface EEG and laminar resolved CSD in a cortical area, we demonstrate that translaminar synaptic currents in visual cortical area V4 contribute to the generation of attention-associated electric fields during visual search. The dipole resulting in this electric field stemmed from layer-specific interactions in extragranular (top-down recipient) cortical layers. Unexpectedly, we discovered that the contribution of a cortical column to the overlying electric field depended on whether the visual feature in the RF matched the selectivity of the column – an important consideration in the mechanism producing EEG potentials that may not be observable through the macroscopic EEG signal alone.

### Columnar mosaic underlying EEG

Our discovery that dipoles established by synaptic currents in visual cortical columns underlie the generation of the attention-associated electric fields is consistent with the observation that ERP components such as the N2pc are largest over the occipital lobe in humans (Luck and Hillyard, 1990, 1994) and macaques (Woodman et al., 2007) and with human MEG studies (Hopf et al., 2000). While the objective of this investigation was to identify interlaminar interactions producing these attention-associated electric fields, the approach also affords the opportunity to better

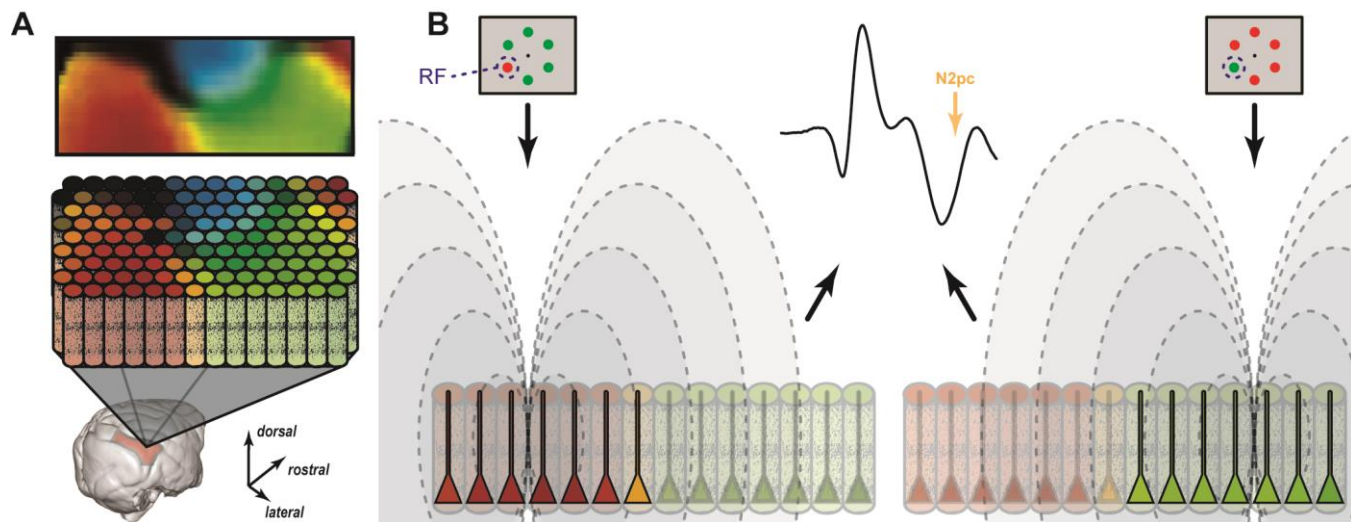

**Figure 6.** Feature Mosaic Hypothesis. (A) Top, a map of preferred color in area V4 derived from optical imaging (Tanigawa et al. 2010). Middle, a surface view map of columns extending through the layers of area V4. Bottom, this columnar structure was observed when neural signals were sampled across all layers of area V4 on the surface of the prelunate gyrus highlighted red on structural brain scan obtained from monkey Z. (B) Relative contributions of cortical columns in area V4 to the attention-associated electric field when a red (left) or green (right) target appears in the RF. Intensity of pyramidal neuron activity is indicated by saturation in the diagram. The mesoscopic columns produce electric fields (dashed lines) that sum to produce the equivalent ERP.

266 understand the neural circuitry that produces it. For example, we sought to understand how visual processing  
267 characteristics, in the form of feature selectivity, of cortical columns contributes to the generation of the electric field.  
268 Visual features, like color used in this study, can be decoded from extracranial signals like EEG (Sandhaeger et al.,  
269 2019; Sutterer et al., 2021). Visual cortical area V4 contains a functional map of hue along its surface (Tanigawa et al.,  
270 2011) with individual columns comprising the map preferring the same color (Zeki, 1973, 1980; Tootell et al., 2004;  
271 Conway and Tsao, 2009; Kotake et al., 2009). We demonstrate that color-feature selectivity was consistent along  
272 cortical depth and discovered that the contribution of a column to the global electric field was greater when the feature  
273 in the RF was the preferred feature of the column. Specifically, columns that preferred green (or red) contributed more  
274 to the electric field when the item in the RF was green (or red) rather than red (or green).

275 The implications of this unexpected finding are illustrated in Figure 8A-B, which portrays how an attention-  
276 associated electric field like the N2pc can arise from different populations of cortical columns. Columns with receptive  
277 fields enclosing the target and also being selective for the particular features of the target establish stronger dipoles  
278 than do columns either representing different parts of visual space or other visual features. If target position or target  
279 feature change, then the columns contributing the strongest dipoles change accordingly. It is important to note that  
280 columns contribute regardless of the feature (provided the attended target is in the RF), there is simply a greater  
281 relative contribution when the attended item is a visual feature preferred by the columnar microcircuit. It is an open  
282 question whether these shifts in the voltage distribution are measurable on the human scalp due to smearing of the  
283 signals as they propagate through the skull and scalp (Nunez and Srinivasan, 2006). Additionally, we do not know if  
284 this observation generalizes to other cortical areas or other ERP components. However, the discovery has this general  
285 implication: A given ERP can arise from qualitatively different neural circuit configurations. This implication entails  
286 specific limits on the nature of mechanistic inferences available from ERP measures.

### 287 Plausible N2pc localization

288 The attention-associated electric field measured in our task is most likely representative of the commonly measured  
289 N2pc component of the EEG ERP. Given our findings regarding the functional architecture comprising attention-  
290 associated electric fields, it is conceivable that the N2pc arises from multiple, anatomically distinct cortical areas. That  
291 is, given the ubiquity of columnar architecture in sensory cortex and the specificity of visual feature representations to  
292 different cortical areas, electric dipoles formed across visual cortical layers could come about across multiple visual  
293 cortical areas with the relative contribution of each depending on the feature being attended to. This realization could  
294 help reconcile conflicting interpretations of the cognitive states and operations that are supposed to be indexed by the  
295 N2pc (Eimer, 1996; Kiss et al., 2008; Pagano and Mazza, 2012; Foster et al., 2020). Moreover, contributions from  
296 areas other than V4 are plausible because previous neurophysiological studies in macaques demonstrate attentional  
297 selection signals during visual search in the temporal (e.g., Sato, 1988), parietal (e.g., Bisley and Mirpour, 2019), and  
298 frontal (e.g., Thompson et al. 2005; Zhou and Desimone 2011) lobes. Of particular note, neuroimaging studies in  
299 humans indicate a contribution to the N2pc from posterior parietal cortex (Hopf et al., 2000). In the same vein, FEF  
300 neurons locate the target among distractors as early as, or even before, the N2pc arises (Cohen et al., 2009; Purcell et  
301 al., 2013). Given the interconnectivity of FEF and V4 (Schall et al., 1995; Ungerleider et al., 2008; Gregorio et al. 2012;  
302 Ninomiya et al. 2012), the frontal lobe thus could be the functional origin of an attentional selection signal  
303 communicated to V4 and other posterior areas (Armstrong and Moore, 2007; Ekstrom et al., 2009; Gregoriou et al.,  
304 2009, 2012; Marshall et al., 2015; Popov et al., 2017), which in turn generate the N2pc (Westerberg and Schall, 2021)  
305 which would be observable as the attention-associated electric field demonstrated in our data.  
306  
307

## 308 **Methods**

### 309 Animal Care

310 Procedures were in accordance with National Institutes of Health Guidelines, Association for Assessment and  
311 Accreditation of Laboratory Animal Care Guide for the Care and Use of Laboratory Animals, and approved by the  
312 Vanderbilt Institutional Animal Care and Use Committee following United States Department of Agriculture and Public  
313 Health Services policies. Animals were socially housed. Animals were on a 12-hour light-dark cycle and all  
314 experimental procedures were conducted in the daytime. Each monkey received nutrient-rich, primate-specific food  
315 pellets twice a day. Fresh produce and other forms of environmental enrichment were given at least five times a week.  
316

### 317 Surgical Procedures

318 Two male macaque monkeys (*Macaca mulatta* monkey Z, 12.5 kg; *Macaca radiata* monkey P, 9 kg) were implanted  
319 with head posts and skull-embedded EEG arrays using previously described techniques (Woodman et al., 2007). One  
320 monkey (monkey P) was implanted with a subconjunctive eye coil. Two male macaque monkeys (*Macaca radiata*;  
321 monkey Ca, 7.5 kg; He, 7.3 kg) were implanted with head posts and MR compatible recording chambers with  
322 craniotomy over V4. Anesthetic induction was performed with ketamine (10 mg/kg). Monkeys were then catheterized  
323 and intubated. Surgeries were conducted aseptically with animals under O<sub>2</sub>, isoflurane (1-5%) anesthesia. EKG,  
324 temperature, and respiration were monitored. Postoperative antibiotics and analgesics were administered. Further  
325 detail is documented elsewhere (Woodman et al., 2007; Westerberg et al., 2020a, 2020b).



326

327 Magnetic Resonance Imaging

328 Anesthetized animals were placed in a 3 Tesla Magnetic Resonance Imaging (MRI) scanner. T1-weighted 3D  
329 MPRAGE scans were acquired with a 32-channel head coil equipped for SENSE imaging. Images were acquired using  
330 0.5 mm isotropic voxel resolution with parameters: repetition 5 s, echo 2.5 ms, flip angle 7°.

331

332 Visual Search Tasks

333 Monkeys performed a color pop-out (monkeys Ca, He, and Z) or T/L (monkey P) search. Search arrays were  
334 presented on a CRT monitor at 60 Hz, at 57 cm distance. Stimulus generation and timing were done with TEMPO  
335 (Reflective Computing). Event times were assessed with a photodiode on the CRT. We used isoluminant red and  
336 green disks on a gray background (pop-out) or uniform gray T's and L's on a black background (T/L). Target feature  
337 varied within session for monkeys Ca, He, and Z. Monkey P identified the same target on any given session (T or L)  
338 but changed specific targets session to session. Trials were initiated by fixating within 1 (monkeys Ca and He) or 2  
339 (monkeys P and Z) degrees of visual angle (dva) of a fixation dot. Time between fixation and array onset was at least  
340 500 ms (monkey P: 500–1000 ms; Z: 500 ms; Ca and He: 750–1250 ms). For monkeys experiencing a range of  
341 fixation periods (monkeys Ca, He, Z), a nonaging foreperiod function was used to determine the fixation period on a  
342 trial-by-trial basis. Arrays comprised of 6 (monkeys Ca and He) or 8 (monkeys P and Z) items. Monkeys P and Z  
343 experienced invariable array eccentricity (10 dva) and item size (monkey P: 1.3x1.3 dva; Z: 1x1 dva). 2 items were  
344 positioned on the vertical meridian, 2 on the horizontal, and the 4 remaining items equally spaced between. Monkeys  
345 Ca and He viewed items where size scaled with eccentricity at 0.3 dva per 1 dva eccentricity so that they were smaller  
346 than the average V4 receptive field (RF) (Freeman and Simoncelli, 2011). The angular position of items relative to  
347 fixation varied session to session so that 1 item was positioned at the center of the RF. Items were equally spaced  
348 relative to each other and located at the same eccentricity. Each trial, 1 array item was different from the others.  
349 Monkeys saccaded to the oddball within 1 (monkeys Ca and He) or 2 s (monkeys P and Z) and maintained fixation  
350 within 2–5 dva of the target for more than 400 ms (monkeys Ca, He, and Z: 500 ms; monkey P: 400–800 ms). Juice  
351 reward was administered following successfully completion of the trial. The target item had an equal probability of  
352 being located at any of the 6 or 8 locations. Eye movements were monitored at 1 kHz or 250 Hz using a corneal  
353 reflection system (monkeys Ca, He, and Z) or a scleral search coil (monkey P), respectively. If the monkey failed to  
354 saccade to the target, they experienced a timeout (1–5 s).

355

356 10-20 EEG Recordings

357 Two monkeys were implanted with an array of electrodes approximating the human 10-20 system locations (monkey  
358 P: FpFz, C3, C4, P3, P4, OL, OR, Oz; monkey Z: FpFz, Fpz, F3, F4, FCz, Cz, C3, C4, Pz, P5, P6, POz, O1, O2, Oz)  
359 (Jasper 1958). Referencing was done using either the FpFz electrode (monkey P) or through linked ears (Z). The  
360 impedance of the individual electrodes was confirmed to be between 2–5 kOhm at 30 Hz, resembling electrodes used  
361 for human EEG. EEG was recorded using a Multichannel Acquisition Processor (Plexon) at 1 kHz and filtered between  
362 0.7–170 Hz. Data was aligned to array onset and baseline corrected by subtracting the average activity during the 50  
363 ms preceding the array onset from all timepoints. Data was clipped 20 ms prior to saccade to eliminate eye movement  
364 artifacts.

365

366 Simultaneous V4 CSD and Extracranial Recordings

367 The extracranial electric fields and laminar V4 neurophysiology were acquired at 24 kHz using a PZ5 and RZ2  
368 (Tucker-Davis). Signals were filtered between 0.1–12 kHz. V4 data was collected from 2 monkeys (monkey Ca: left  
369 hemisphere; He: right) across 30 sessions (monkey Ca: 21; monkey He: 9) using 32-channel linear electrode arrays  
370 with 0.1 mm interelectrode spacing (Plexon) introduced through the intact dura mater each session. Arrays spanned  
371 layers of V4 with a subset of electrode contacts deliberately left outside of cortex. The extracranial electric field was  
372 derived from the most superficial electrode outside the brain filtered between 1–100 Hz. CSD was computed from the  
373 raw signal by taking the second spatial derivative along electrodes (Nicholson and Freeman, 1975; Schroeder et al.,  
374 1998; Mehta et al., 2000; Westerberg et al., 2019) and converting voltage to current (Logothetis et al., 2007). We  
375 computed the CSD by taking the second spatial derivative of the LFP:

376

377

$$CSD(t, d) = -\sigma \left( \frac{x(t, d - z) + x(t, d + z) - 2x(t, d)}{z^2} \right)$$

378

379 where  $x$  is the extracellular voltage at time  $t$  measured at an electrode contact at depth  $d$  and  $z$  is the inter-electrode  
380 distance and  $\sigma$  is conductivity. Both EEG and CSD were baseline corrected at the trial level by subtracting the average  
381 activation during the 300 ms preceding array onset from the response at all timepoints. Extracranial electric field  
382 potentials and CSD profiles were clipped 10 ms prior to saccade at the trial level to eliminate the influence of eye  
383 movements.

384

385 Laminar Alignment

386 Orthogonal array penetrations were confirmed online through a reverse-correlation RF mapping procedure (Nandy et  
387 al., 2017; Westerberg et al., 2019; Cox et al., 2019a, 2019b; Dougherty et al., 2019) (Figure S6A). RFs were found to  
388 represent portions of visual space consistent with previous reports of V4 (Gattass et al., 1988) (Figure S6D). Positions  
389 of recording sites relative to V4 layers were determined using CSD (Schroeder et al., 1998; Nandy et al., 2017) (Figure  
390 S6B). Current sinks following visual stimulation first appear in the granular input layers of cortex, then ascend and  
391 descend to extragranular compartments. We computed CSD and identified the granular input sink session-wise.  
392 Sessions were aligned by this input sink (Figure S6C). 'L4' refers to granular input layer, 'L2/3' - supragranular layers,  
393 and 'L5/6' - infragranular layers. Each laminar compartment was assigned the same number of recording sites to  
394 alleviate biases during analysis.

395  
396 Inverse Modeling

397 Inverse modeling of 10-20 EEG recordings was performed in CURRY 8 (Compumedics Neuroscan). 3D head  
398 reconstruction was created for each monkey (P and Z) using the boundary element method (Hämäläinen and Sarvas,  
399 1989). This method takes into account individual monkey's surface morphologies to create models of cortex surface,  
400 inner and outer skull, and skin boundaries. This model was used in conjunction with EEG to compute a voltage  
401 distribution over the cortical surface. We calculated the current density with sLORETA, which calculates a minimum  
402 norm least squares that divides current by the size of its associated error bar, yielding F scores of activation.  
403 sLORETA produces blurred but accurate localizations of point sources (Pascaul-Marqui, 2002). Other algorithms such  
404 as Minimum Norm and SWARM were modeled as well, with agreement between models sufficient not to change any  
405 conclusions.

406  
407 Information Theory Analyses

408 Information theory (Shannon, 1948) analyses were chosen for several reasons. First, information theory analyses yield  
409 results in terms of 'bits' which can be used to directly compare effect sizes across measurement methods (e.g., CSD,  
410 Extracranial signal, and array composition [directed spatial attention]). Next, these analyses are inherently multivariate  
411 and able to capture linear and nonlinear relationships. Furthermore, information theory is model independent and does  
412 not necessitate a specific hypothetical structure in order to detect relationships between signals. This combination  
413 allows us to detect relationships between the extracranial signal and CSD signal that might not be linear and therefore  
414 would not be captured by linear models or correlation analyses. We chose to measure pairwise mutual information and  
415 information transmission to gauge the relationships between our three 'signals' (e.g., extracranial, CSD, and array  
416 composition [directed spatial attention]). Mutual information is the reduction in uncertainty in one variable afforded by  
417 another known variable. That is, mutual information is greater when you know the state of one variable covaries with  
418 the state of the other variable. If the two variables do not correspond well, mutual information is low. Therefore, the  
419 reduction in uncertainty is formalized as 'information' which is relayed in bits. Mathematically, mutual information is  
420 captured by the following equation (Cover and Thomas, 2006; Beer and Williams, 2015):

421  
422 
$$I(X; Y) = H(X) - H(X|Y)$$

423  
424 where  $H(X)$  and  $H(X|Y)$  are the entropy  $X$  and  $X$  given  $Y$ , respectively. Entropy for a signal ( $S$ ) is computed by:

425  
426 
$$H(S) = \sum_i p(s_i) \log \frac{1}{p(s_i)}$$

427  
428 where  $p(s)$  is the probability distribution for signal  $S$  and  $i$  is the signal state. Therefore, mutual information can be  
429 computed probabilistically by:

430  
431 
$$I(X; Y) = \sum_i \sum_j p(x_i y_j) \log \frac{p(x_i y_j)}{p(x_i) p(y_j)}$$

432  
433 where  $p(x)$ ,  $p(y)$  are the probability distributions for  $X$  and  $Y$ , and  $p(x, y)$  is the joint probability distribution of  $X$  and  $Y$   
434 across signal states  $i$  and  $j$  for  $X$  and  $Y$ , respectively.

435 While mutual information describes the relationship between the two signals (for our purpose: CSD and the  
436 extracranial signal, CSD and directed spatial attention, or the extracranial signal and directed spatial attention), it does  
437 not allow for the evaluation of two signals regarding a third (e.g., CSD and the extracranial signal regarding directed  
438 spatial attention). For analyses where we want to understand information regarding the allocation of directed attention  
439 from the synaptic currents in V4 to the extracranial signal we use a modified equation rooted in the same  
440 entropy/mutual information principles. In computing information transmission, we are interested in the information  
441 about  $X$  (directed spatial attention), transferred from  $Y$  (CSD in V4) to  $Z$  (extracranial signal) formalized as:

$$I_T(X; Y_{past} \rightarrow Z_{future}) = I_{min}(X; Z_{future}, \{Z_{past}, Y_{past}\}) - I_{min}(X; Z_{future}, Z_{past})$$

where *past* and *future* describe the timepoints when the data is taken from. The information transmission ( $I_T$ ) is taken as the difference between two minimum information calculations. The minimum information ( $I_{min}$ ) is computed regarding the combination of the individual signals ( $S_1$  and  $S_2$ ) at the specified time periods as:

$$I_{min}(X; S_1, S_2) = \sum_x p(x) \min \{I(X = x; S_1), I(X = x; S_2)\}$$

where  $p(x)$  is the probability distribution for signal  $X$  and  $x$  are the possible states of  $X$ . By taking into account different timepoints for the signals we can interpret this computation as the information about  $X$  (directed spatial attention) shared by  $Y_{past}$  (e.g., earlier CSD in V4) and  $Z_{future}$  (e.g., later extracranial signal) that was not already in  $Z_{past}$  (e.g., earlier extracranial signal).

Above information theory analyses were performed using the Neuroscience Information Theory Toolbox (Timme and Lapish, 2018). Pairwise mutual information and information transmission were computed at each timepoint across trials for each session using default parameters. Five uniform count bins were used for data binning. 10 ms was used for time lag for information transmission. Only correct trials were included. CSD for each laminar compartment was computed by taking the average activity of 5 sites at the trial level included in each laminar compartment. For mutual information between target position and the extracranial signal, target position was binary where target was either contra- or ipsilaterally presented. For computations within V4, target position was binary where target was either in the RF or positioned opposite the RF. 5000 Monte Carlo simulations were used to generate a distribution of null model values which experimental values were compared to ( $\alpha = 0.05$ ).

#### Feature Selectivity

For each recording site within a column, gamma power (30-90 Hz) (Maier et al., 2010) responses were computed when either a red distractor was presented to the RF of the column or when a green distractor was present to the RF. Responses were taken as the average activation 75–200 ms following array onset. An index was computed from these responses by subtracting the two and dividing by their sum (CSI). Values were therefore bounded between -1 and 1 where larger magnitude indicates greater selectivity for green (towards -1) or red (towards 1). Columnar color selectivity index (CCSI) was computed as the average of CSIs along the entire column. We performed Wilcoxon signed rank tests on the distribution of CSIs across the recording sites of a given cortical column to determine whether a column was significantly color selective ( $\alpha = 0.05$ ). The selective columns were included in feature selectivity analyses where the preferred color and non-preferred color were defined as the color that elicited greater and lesser responses, respectively.

#### Estimating Field Potential from CSD

We calculated the event-related potential at arbitrary positions from the measured laminar CSD ( $ERP_{cal}$ ) using a previously described model (Nicholson and Llinas, 1971; Kajikawa and Schroeder, 2011)

$$ERP_{cal}(d_i, t) = A \sum_j \frac{CSD(d_j, t)}{\sqrt{h^2 + |d_j - d_i|^2}}$$

where  $ERP_{cal}$  at depth  $i$  ( $d_i$ ) for each timepoint ( $t$ ) is taken as the sum of CSD at depths  $j$  ( $d_j$ ) for each timepoint divided by the Euclidean distance to account for the diminishing impact of local currents on more distant field potentials. The factor  $A$  acts only as a scaling factor and we cannot accurately estimate the magnitude of the one-dimensional CSD-derived waveform, so we eliminate this parameter from the calculation. This omission is consistent with previous reports (Kajikawa and Schroeder, 2011) and limits our comparisons of observed ERP and  $ERP_{cal}$  to only shape. However, magnitude differences can be observed between conditions for  $ERP_{obs}$  and  $ERP_{cal}$ , independently. Also, for our purposes, we set  $h$  to 0 as we assume that our observed CSD and the calculated ERP are in the same vertical plane.

#### Data Availability

Data supporting the findings documented in this study are freely available online through Dryad at

<https://doi.org/10.5061/dryad.djh9w0w15>.

#### **Supplemental Information**

Five additional supplementary figures are included to complement and expand primary findings.



498  
499  
500  
501  
502  
503  
504  
505  
506  
507  
508  
509  
510  
511  
512  
513  
514  
515  
516  
517  
518  
519  
520  
521  
522  
523  
524  
525  
526  
527  
528  
529  
530  
531  
532  
533  
534  
535  
536  
537  
538  
539  
540  
541  
542  
543  
544  
545  
546  
547  
548  
549  
550  
551  
552  
553  
554  
555  
556

## Acknowledgements

This work was supported by NIH through the NEI (P30EY008126, R01EY019882, R01EY008890, R01EY027402) and the Office of the Director (S10OD021771). J. A. W. was supported by fellowships from NEI (F31EY031293 and T32EY007135). The authors would like to thank I. Haniff, M. Feurtado, M. Maddox, S. Motorny, D. Richardson, L. Toy, B. Williams, R. Williams for technical support. The authors would like to thank B. Purcell., P. Weigand for collecting data and S. Errington, B. Herrera, K. Lowe, T. Reppert, J. Riera, A. Sajad, E. Sigworth for useful conversations regarding the work.

## Author Contributions

J. A. W., A. M., G. F. W., and J. D. S designed the research. J. A. W., M. S. S., and J. D. S. analyzed the data. J. A. W., M. S. S., and G. F. W. performed research. J. A. W. prepared visualizations. J. A. W., M. S. S., A. M., G. F. W., and J. D. S. wrote the manuscript.

## Declaration of Interests

The authors declare no competing interests.

## References

- Armstrong, K.M., and Moore, T. (2007) Rapid enhancement of visual cortical response discriminability by microstimulation of the frontal eye field. *Proc. Natl. Acad. Sci. U. S. A.* 104, 9499-9504.
- Beer, R.D., and Williams, P.L. (2015). Information processing and dynamics in minimally cognitive agents. *Cogn. Sci.* 39, 1-38.
- Berens, P., Keliris, G.A., Ecker, A.S., Logothetis, N.K., and Tolias, A.S. (2008). Comparing the feature selectivity of the gamma-band of the local field potential and the underlying spiking activity in primate visual cortex. *Front. Syst. Neurosci.* 2, 2.
- Bichot, N.P., Heard, M.T., DeGennaro, E.M., and Desimone, R. (2015). A source for feature-based attention in the prefrontal cortex. *Neuron* 88, 832-844.
- Bichot, N.P., Rossi, A.F., and Desimone, R. (2005). Parallel and serial neural mechanisms for visual search in macaque area V4. *Science* 308, 529-534.
- Bichot, N.P., Xu, R., Ghadooshahy, A., Williams, M.L., and Desimone, R. (2019). The role of prefrontal cortex in the control of feature attention in area V4. *Nat. Commun.* 10, 5727.
- Bisley, J.W., and Mirpour, K. (2019). The neural instantiation of a priority map. *Curr. Opin. Psychol.* 29, 108–112.
- Bruyins-Haylett, M., Luo, J., Kennerley, A.J., Harris, S., Boorman, L., Milne, E., Vautrelle, N., Hayashi, Y., Whalley, B.J., Jones, M., Berwick, J., Riera, J., and Zheng, Y. (2017). The neurogenesis of P1 and N1: a concurrent EEG/LFP study. *NeuroImage* 146, 575-588.
- Buffalo, E.A., Fries, P., Landman, R., Buschman, T.J., and Desimone, R. (2011). Laminar differences in gamma and alpha coherence in the ventral stream. *Proc. Natl. Acad. Sci. U. S. A.* 108, 11262-11267.
- Cohen, J.Y., Heitz, R.P., Schall, J.D., and Woodman, G.F. On the origin of event-related potentials indexing covert attentional selection during visual search. *J. Neurophysiol.* 102, 2375–2386.
- Cohen, M.X. (2017). Where does EEG come from and what does it mean? *Trends Neurosci.* 40, 208–218.
- Conway, B.R., and Tsao, D.Y. (2009). Color-tuned neurons are spatially clustered according to color preference within alert macaque posterior inferior temporal cortex. *Proc. Natl. Acad. Sci. U. S. A.* 106, 18034-18039.
- Cox, M.A., Dougherty, K., Adams, G.K., Reavis, E.A., Westerberg, J.A., Moore, B.S., Leopold, D.A., and Maier, A. (2019a). Spiking suppression precedes cured attentional enhancement of neural responses in primary visual cortex. *Cereb. Cortex* 29, 77–90.
- Cox, M.A., Dougherty, K., Westerberg, J.A., Schall, M.S., and Maier, A. (2019b). Temporal dynamics of binocular integration in primary visual cortex. *J. Vis.* 19, 1–13.
- Dougherty, K., Cox, M.A., Westerberg, J.A., and Maier, A. (2019). Binocular modulation of monocular V1 neurons. *Curr. Biol.* 29, 381–391.
- Eimer, M. (1996). The N2pc component as an indicator of attentional selectivity. *Electroencephalogr. Clin. Neurophysiol.* 99, 225–234.
- Ekstrom, L.B., Roelfsema, P.R., Arsenault, J.T., Kolster, H., and Vanduffel, W. (2009). Modulation of the contrast response function by electrical microstimulation of the macaque frontal eye field. *J. Neurosci.* 29, 10683-10694.
- Engel, T.A., Steinmetz, N.A., Gieselmann, M.A., Thiele, A., Moore, T., and Boahen, K. (2016). Selective modulation of cortical state during spatial attention. *Science* 354, 1140-1144.
- Ferro, D., van Kempen, J., Boyd, M., Panzeri, S., and Thiele, A. (2021). Directed information exchange between cortical layers in macaque V1 and V4 and its modulation by selective attention. *Proc. Natl. Acad. Sci. U. S. A.* 118, e2022097118.

- 557 Foster, J.J., Bsaies, E.M., and Awh, E. (2020). Covert spatial attention speeds target individuation. *J. Neurosci.* 40,  
558 2717–2726.
- 559 Freeman, J., and Simoncelli, E.P. (2011). Metamers of the ventral stream. *Nat. Neurosci.* 14, 1195–1201.
- 560 Gattass, R., Sousa, A.P., and Gross, C.G. (1988). Visuotopic organization and extent of V3 and V4 of the macaque. *J.*  
561 *Neurosci.* 8, 1831–1845.
- 562 Godlove, D.C., Maier, A., Woodman, G.F., and Schall, J.D. (2014). Microcircuitry of agranular frontal cortex: testing the  
563 generality of the canonical cortical microcircuit. *J. Neurosci.* 34, 5355–5369.
- 564 Grech, R., Cassar, T., Muscat, J., Camilleri, K.P., Fabri, S.G., Zervakis, M., Xanthopoulos, P., Sakkalis, V., and  
565 Vanrumste, B. (2008). Review on solving the inverse problem in EEG source analysis. *J. Neuroengineer.*  
566 *Rehab.* 5, 25.
- 567 Gregoriou, G.G., Gotts, S.J., and Desimone, R. (2012). Cell-type-specific synchronization of neural activity in FEF with  
568 V4 during attention. *Neuron* 73, 581–594.
- 569 Gregoriou, G.G., Gotts, S.J., Zhou, H.H., and Desimone, R. (2009). High-frequency, long-range coupling between  
570 prefrontal and visual cortex during attention. *Science* 324, 1207–1210.
- 571 Hämäläinen, M., and Sarvas, J. (1989). Realistic conductivity geometry model of the human head for interpretation of  
572 neuromagnetic data. *IEEE Trans. Biomed. Eng.* 36, 165–171.
- 573 Hansen, B.J., Eagleman, S., and Dragoi, V. (2011). Examining local network processing using multi-contact laminar  
574 electrode recording. *J. Vis. Exp.* 8, 2806.
- 575 Hembrook-Short, J.R., Mock, V.L., and Briggs, F. (2017). Attentional modulation of neuronal activity depends on  
576 neuronal feature selectivity. *Curr. Biol.* 27, 1878–1887.
- 577 Hopf, J.M. et al. (2000). Neural sources of focused attention in visual search. *Cereb. Cortex* 10, 1233–1241.
- 578 Jasper, H.H. (1958). The ten-twenty electrode system of the international federation. *Electroencephalogr. Clin.*  
579 *Neurophysiol.* 10, 370–375.
- 580 Jellema, T., Brunia, C.H.M., and Wadman, W.J. (2004). Sequential activation of microcircuits underlying  
581 somatosensory-evoked potentials in rat neocortex. *Neuroscience* 129, 283–295.
- 582 Kajikawa, Y., and Schroeder, C.E. (2011). How local is the local field potential? *Neuron* 72, 847–858.
- 583 Kiss, M., Van Velzen, J., and Eimer, M. (2008). The N2pc component and its links to attention shifts and spatially  
584 selective visual processing. *Psychophysiology* 45, 240–249.
- 585 Klein, C., Evrard, H.C., Shapcott, K.A., Haverkamp, S., Logothetis, N.K., and Schmid, M.C. (2016). Cell-targeted  
586 optogenetics and electrical microstimulation reveal the primate koniocellular projection to supra-granular visual  
587 cortex. *Neuron* 90, 143–151.
- 588 Kotake, Y., Morimoto, H., Okazaki, Y., Fujita, I., and Tamura, H. (2009). Organization of color-selective neurons in  
589 macaque visual area V4. *J. Neurophysiol.* 102, 15–27.
- 590 Logothetis, N.K., Kayser, C., and Oeltermann, A. (2007). In vivo measurement of cortical impedance spectrum in  
591 monkeys: implications for signal propagation. *Neuron* 55, 809–823.
- 592 Luck, S.J., Chelazzi, L., Hillyard, S.A., and Desimone, R. (1997). Neural mechanisms of spatial selective attention in  
593 areas V1, V2, and V4 of macaque visual cortex. *J. Neurophysiol.* 77, 24–42.
- 594 Luck, S.J., and Hillyard, S.A. (1990). Electrophysiological evidence for parallel and serial processing during visual  
595 search. *Percept. Psychophys.* 43, 603–617.
- 596 Luck, S.J., and Hillyard, S.A. (1994). Electrophysiological correlates of feature analysis during visual search.  
597 *Psychophysiology* 31, 291–308.
- 598 Maier, A., Adams, G.K., Aura, C., and Leopold, D.A. (2010). Distinct superficial and deep laminar domains of activity in  
599 the visual cortex during rest and stimulation. *Front. Syst. Neurosci.* 4, 31.
- 600 Marshall, T.R., O’Shea, J., Jensen, O., and Bergmann, T.O. (2015). Frontal eye fields control attentional modulation of  
601 alpha and gamma oscillations in contralateral occipitoparietal cortex. *J. Neurosci.* 35, 1638–1647.
- 602 Mehta, A.D., Ulbert, I., and Schroeder, C.E. (2000). Intermodal selective attention in monkeys. II: physiological  
603 mechanisms of modulation. *Cereb. Cortex* 10, 359–370.
- 604 Michel, C.M., Murray, M.M., Lantz, G., Gonzalez, S., Spinelli, L., and Grave de Peralta, R. (2004). EEG source  
605 imaging. *Clin. Neurophysiol.* 115, 2195–2222.
- 606 Moran, J., and Desimone, R. (1985). Selective attention gates visual processing in the extrastriate visual cortex.  
607 *Science* 229, 782–784.
- 608 Musall, S., von Pfostl, V., Rauch, A., Logothetis, N.K., and Whittingstall, K. (2014). Effects of neural synchrony on  
609 surface EEG. *Cereb. Cortex* 24, 1045–1053.
- 610 Nandy, A.S., Nassi, J.J., and Reynolds, J.H. (2017). Laminar organization of attentional modulation in macaque visual  
611 area V4. *Neuron* 93, 235–246.
- 612 Næss, S., Halnes, G., Hagen, E., Hagler Jr., D.J., Dale, A.M., Einevoll, G.T., and Ness, T.V. (2021). Biophysically  
613 detailed forward modeling of the neural origin of EEG and MEG signals. *NeuroImage* 225, 117467.
- 614 Nicholson, C., and Freeman, J.A. (1975). Theory of current source-density analysis and determination of conductivity  
615 tensor for anuran cerebellum. *J. Neurophysiol.* 38, 356–368.

- 616 Nicholson, C., and Llinas, R. (1971). Field potentials in the alligator cerebellum and theory of their relationship to  
617 Purkinje cell dendritic spikes. *J Neurophysiol.* 34, 509-531.
- 618 Ninomiya, T., Sawamura, H., Inoue, K., and Takada, M.J. (2012). Segregated pathways carrying frontally derived top-  
619 down signals to visual areas MT and V4 in macaques. *J. Neurosci.* 32, 6851-6858.
- 620 Nunez, P.L., and Srinivasan, R. (2006). *Electric fields of the brain: the neurophysics of EEG.* Oxford University Press,  
621 USA.
- 622 Pagano, S., and Mazza V. (2012). Individuation of multiple targets during visual enumeration: new insights from  
623 electrophysiology. *Neuropsychologia* 50, 751–761.
- 624 Pascual-Marqui, R.D. (2002). Standardized low-resolution brain electromagnetic tomography (sLORETA): technical  
625 details. *Methods Find. Exp. Clin. Pharmacol.* 24, 5–12.
- 626 Popov, T., Kastner, S., Jensen, O. (2017). FEF-controlled alpha delay activity precedes stimulus-induced gamma-band  
627 activity in visual cortex. *J. Neurosci.* 37, 4117-4127.
- 628 Purcell, B.A., Schall, J.D., and Woodman, G.F. (2013). On the origin of event-related potentials indexing covert  
629 attentional selection during visual search: timing of selection by macaque frontal eye field and event-related  
630 potentials during pop-out search. *J. Neurophysiol.* 109, 557–569.
- 631 Ray, S., and Maunsell, J.H.R. (2011). Different origins of gamma rhythm and high-gamma activity in macaque visual  
632 cortex. *PLoS Biol.* 9.
- 633 Roe, A.W. et al. (2012). Toward a unified theory of visual area V4. *Neuron* 74, 12–29.
- 634 Sandhaeger, F., van Nicolai, C., Miller, E.K., and Siegel, M. (2019). Monkey EEG links neuronal color and motion  
635 information across species and scales. *eLife* 8, e45645.
- 636 Sato, T. (1988). Effects of attention and stimulus interaction on visual responses of inferior temporal neurons in  
637 macaque. *J. Neurophysiol.* 60, 344-364.
- 638 Schall, J.D., Morel, A., King, D.J., and Bullier, J. (1995). Topography of visual connections with frontal eye field in  
639 macaque: convergence and segregation of processing streams. *J. Neurosci.* 15, 4464–4474.
- 640 Schroeder, C.E., and Givre, S.J. (1992). Subcortical contributions to the surface-recorded flash-VEP in the awake  
641 macaque. *Electroencephalogr. Clin. Neurophysiol.* 84, 219-231.
- 642 Schroeder, C.E., Mehta, A.D., and Givre, S.J. (1998). A spatiotemporal profile of visual system activation revealed by  
643 current source density analysis in the awake macaque. *Cereb. Cortex* 8, 575–592.
- 644 Schmid, M.C., Oeltermann, A., Juchem, C., Logothetis, N.K., and Smirnakis, S.M. (2006). Simultaneous EEG and  
645 fMRI in the macaque monkey at 4.7 Tesla. *Magn. Reson. Imaging* 24, 335-342.
- 646 Self, M.W., van Kerkoerle, T., Super, H., and Roelfsema, P.R. (2013). Distinct roles of the cortical layers of area V1 in  
647 figure-ground segregation. *Curr. Biol.* 23, 2121-2129.
- 648 Shannon, C.E. (1948). A mathematical theory of communication. *Bell Syst. Tech. J.* 27, 379–423.
- 649 Snyder, A.C., and Smith, M.A. (2015). Stimulus-dependent spiking relationships with the EEG. *J. Neurophysiol.* 114,  
650 1468-1482.
- 651 Tanigawa, H., Lu, H.D., and Roe A.W. (2010). Functional organization for color and orientation in macaque V4. *Nat.*  
652 *Neurosci.* 13, 1542–1548.
- 653 Thompson, K.G., Biscoe, K.L., and Sato, T.R. (2005). Neuronal basis of covert spatial attention in the frontal eye field.  
654 *J. Neurosci.* 25, 9479-9487.
- 655 Timme, N., and Lapish C. (2018). A tutorial for information theory in neuroscience. *eNeuro* 5.
- 656 Tootell, R.B.H., Nelissen, K., Vanduffel, W., and Orban, G.A. (2004). Search for color ‘center(s)’ in macaque visual  
657 cortex. *Cereb. Cortex* 14, 353-363.
- 658 Tovar, D.A., Westerberg, J.A., Cox, M.A., Dougherty, K., Carlson, T.A., Wallace, M.T., and Maier, A. (2020). Stimulus-  
659 feature specific information flow along the columnar cortical microcircuit revealed by multivariate laminar  
660 spiking analysis. *Front. Syst. Neurosci.* 14, 600601.
- 661 Trautmann, E.M., Stavisky, S.D., Lahiri, S., Ames, K.C., Kaufman, M.T., O’Shea, D.J., Vyas, S., Sun, X., Ryu, S.I.,  
662 Ganguli, S., and Shenoy, K.V. (2019). Accurate estimation of neural population dynamics without spike  
663 sorting. *Neuron* 103, 292-308.
- 664 Ungerleider, L.G., Galkin, T.W., Desimone, R., and Gattass R. (2008). Cortical connection of area V4 in the macaque.  
665 *Cereb. Cortex* 18, 477–499.
- 666 van Kerkoerle, T., Self, M.W., and Roelfsema, P.R. (2017). Layer-specificity in the effects of attention and working  
667 memory on activity in primary visual cortex. *Nat. Comm.* 5, 14.
- 668 Westerberg, J.A., Cox, M.A., Dougherty, K., and Maier, A. (2019). V1 microcircuit dynamics: altered signal propagation  
669 suggests intracortical origins for adaptation in response to visual repetition. *J. Neurophysiol.* 121, 1938–1952.
- 670 Westerberg, J.A., Maier, A., and Schall, J.D. (2020). Priming of attentional selection in macaque visual cortex: feature-  
671 based facilitation and location-based inhibition of return. *eNeuro* 7.
- 672 Westerberg, J.A., Maier, A., Woodman, G.F., and Schall, J.D. (2020). Performance monitoring during visual priming. *J.*  
673 *Cogn. Neurosci.* 32, 515–526.
- 674 Westerberg, J.A., and Schall, J.D. (2021). Neural mechanism of priming in visual search. *Atten. Percept. Psychophys.*  
675 83, 587-602.



- 676 Whittingstall, K., and Logothetis, N.K. (2009). Frequency-band coupling in surface EEG reflects spiking activity in  
677 monkey visual cortex. *Neuron* 64, 281-289.
- 678 Woodman, G.F. (2012). Homologues of human event-related potential components in nonhuman primates. In Luck,  
679 S.J., and Kappenman, E.S. (eds.), *The Oxford Handbook of Event-Related Potential Components*. (pp. 611-  
680 625). New York: Oxford University Press.
- 681 Woodman, G.F., Kang, M.S., Rossi, A.F., and Schall, J.D. (2007). Nonhuman primate event-related potentials indexing  
682 covert shifts of attention. *Proc. Natl. Acad. Sci. USA* 104, 15111–15116.
- 683 Woodman, G.F., and Luck, S.J. (1999). Electrophysiological measurement of rapid shifts of attention during visual  
684 search. *Nature* 400, 867–869.
- 685 Zeki, S. (1973). Colour coding in rhesus monkey prestriate cortex. *Brain Res.* 53, 422-427.
- 686 Zeki, S. (1980). The representation of colours in the cerebral cortex. *Nature* 284, 412-418.
- 687 Zhou, H., and Desimone, R. (2011). Feature-based attention in the frontal eye field and area V4 during visual search.  
688 *Neuron* 70, 1205-1217.

689  
690

## Supplementary Figures and Supplementary Figure Legends

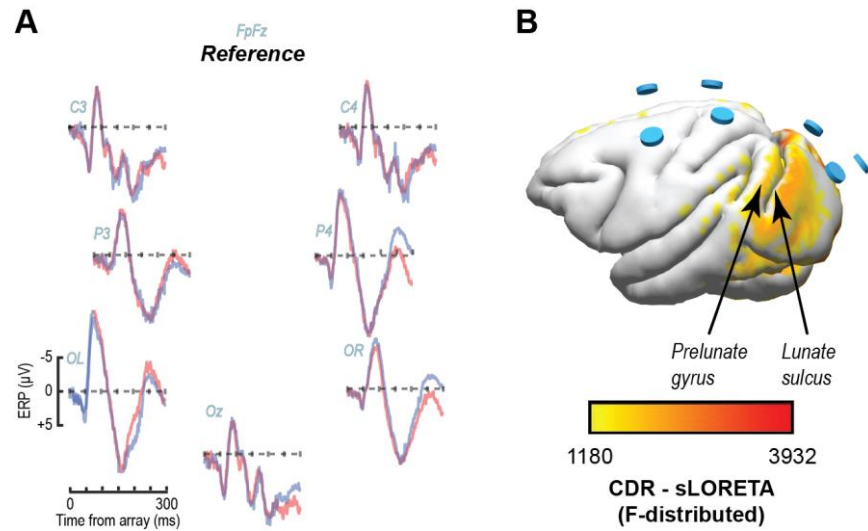

691  
692  
693  
694  
695  
696  
697

**Figure S1.** N2pc Distribution of monkey P (10-20 EEG recordings). (A) EEG traces for right (blue) and left (red) visual hemifield target presentations. Organization of traces reflects electrode positions. Scale is consistent across traces and is indicated by OL. N2pc was found to be significant through an ANOVA measured as the interaction between posterior electrode sites, the target position in the array, and the set size sites (sites OR and OL,  $F(2,42) = 8.39$ ,  $p < 0.001$ ). (B) Inverse solution using sLORETA for N2pc (mean 190-300 ms following array onset) during a right visual hemifield target presentation displayed over the 3D render of MR scan for monkey P. Data clipped below 30% maximum value. Cyan cylinders indicate EEG electrode positions.

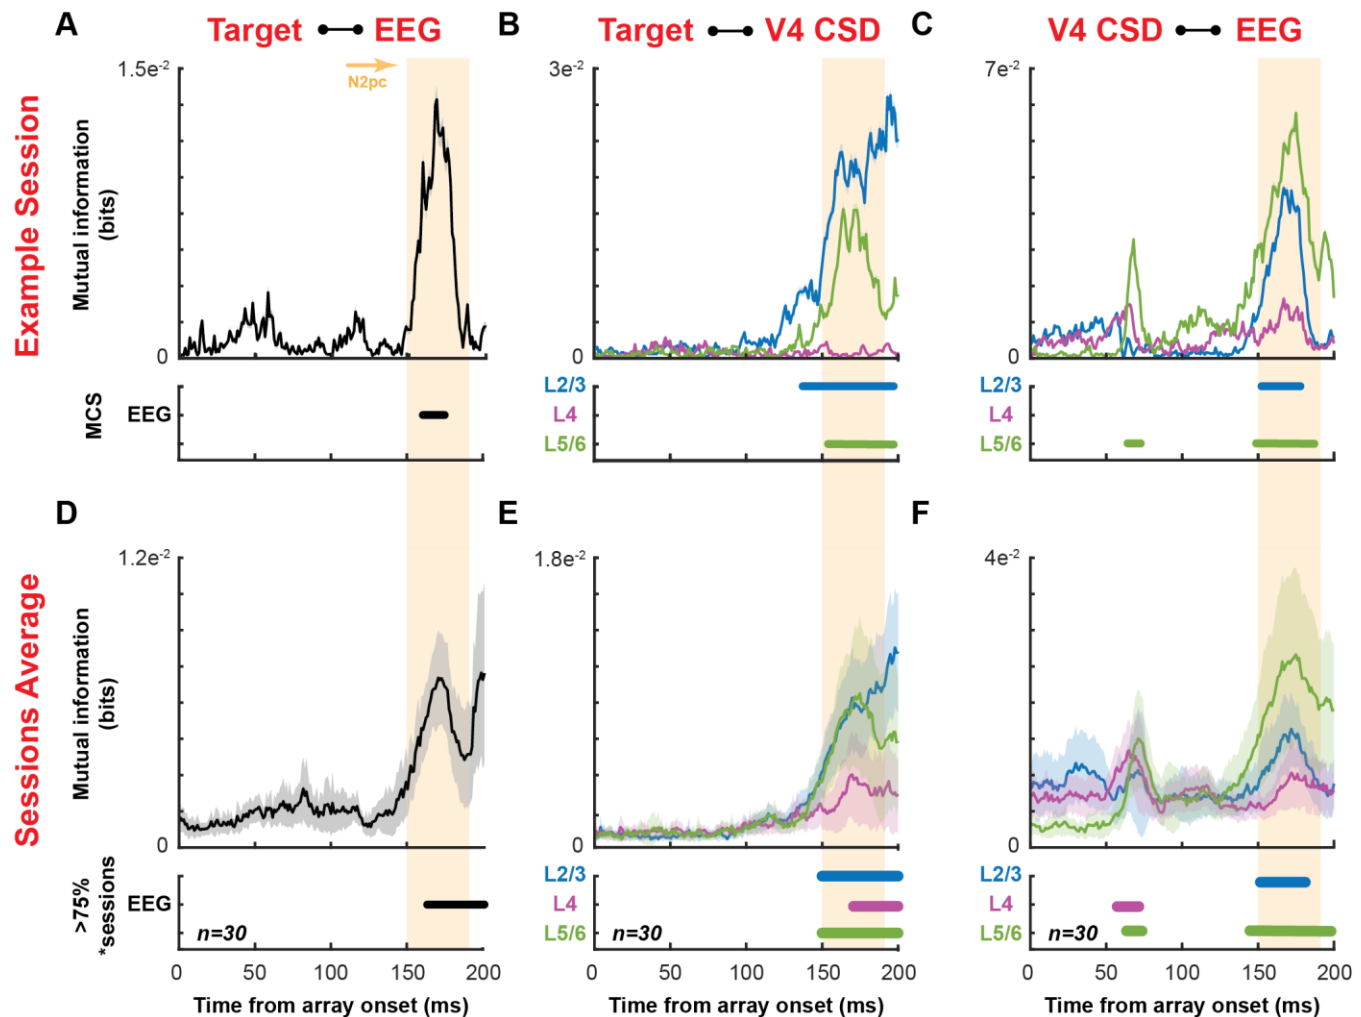

698  
 699 **Figure S2.** Mutual information measures for the extracranial signal, V4 CSD, and target position. (A) Mutual information between target position  
 700 (binarily coded contra- or ipsi-presentation) and the extracranial signal along time (top) aligned on array onset with 95% CI cloud estimated from  
 701 subsampling 75% of the data 100 times and recomputing. Significance established through Monte Carlo simulations is indicated below. Only epochs  
 702 where significance >10 ms were included. Orange region indicates N2pc. (B) Mutual information between target position (binarily coded inside or  
 703 opposite column RF) and each laminar compartment (L2/3 (blue), L4 (purple), and L5/6 (green)). Panel organization identical to (A). (C) Mutual  
 704 information between the extracranial signal and each laminar compartment. Panel organization identical to (A). (D-F) Population averages (n=30)  
 705 mutual information measures. Same organization as representative session, (A-C) respectively. Clouds around averages denote 95% confidence  
 706 interval (CI) across sessions. Statistical measures for population averages reflect epoch's where 75% sessions were found to be significant through  
 707 Monte Carlo simulations for >10 ms.



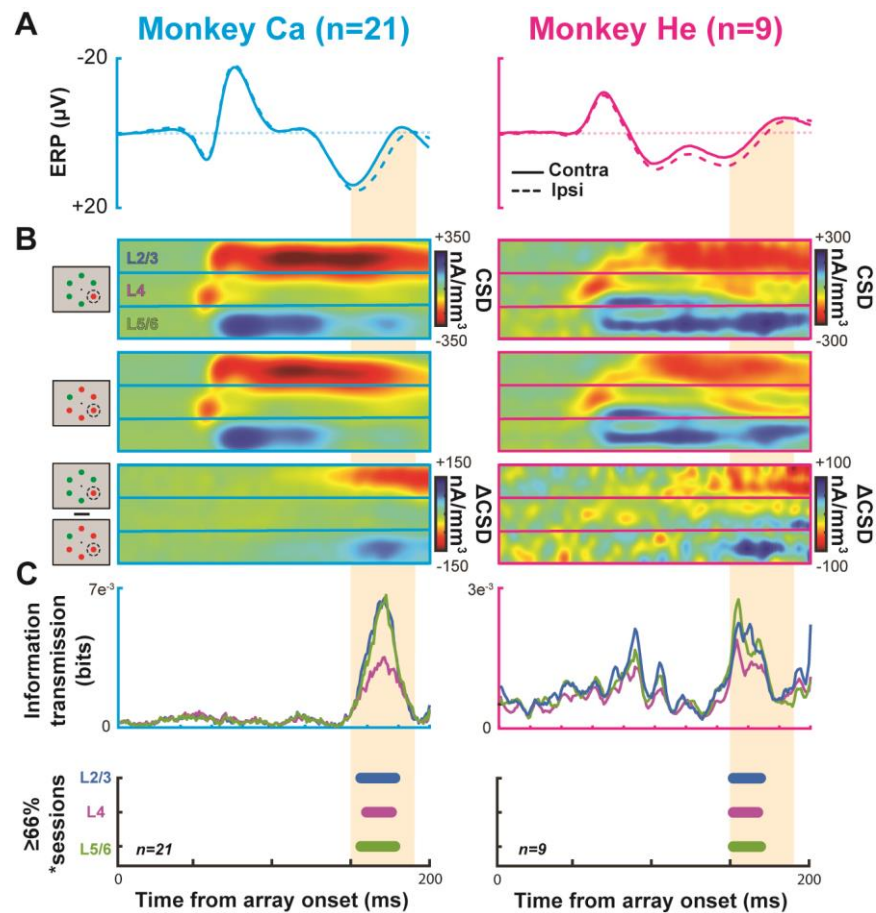

708

709

710

711

712

713

714

715

**Figure S3.** Individual monkey physiology and information transmission. Results for monkey Ca ( $n = 21$ ) in left column and He ( $n = 9$ ) in right column. (A) extracranial signal traces for target contralateral (solid line) and ipsilateral (dashed line) to recording site. Orange highlight represents the average time of N2pc used throughout the rest of the manuscript (150 – 190 ms). (B) Current source density profile for target in RF (top), outside RF (center), and the difference between the two (bottom). Horizontal boundaries indicate laminar compartments. (C) Information transmission regarding target position from laminar CSD to the extracranial signal (top). Blue represents L2/3, purple represents L4, and green represents L5/6. Timepoints where 66% of recorded sessions showed significant information transmission for more than 10 consecutive milliseconds through Monte Carlo simulations for each laminar compartment are shown at the bottom.

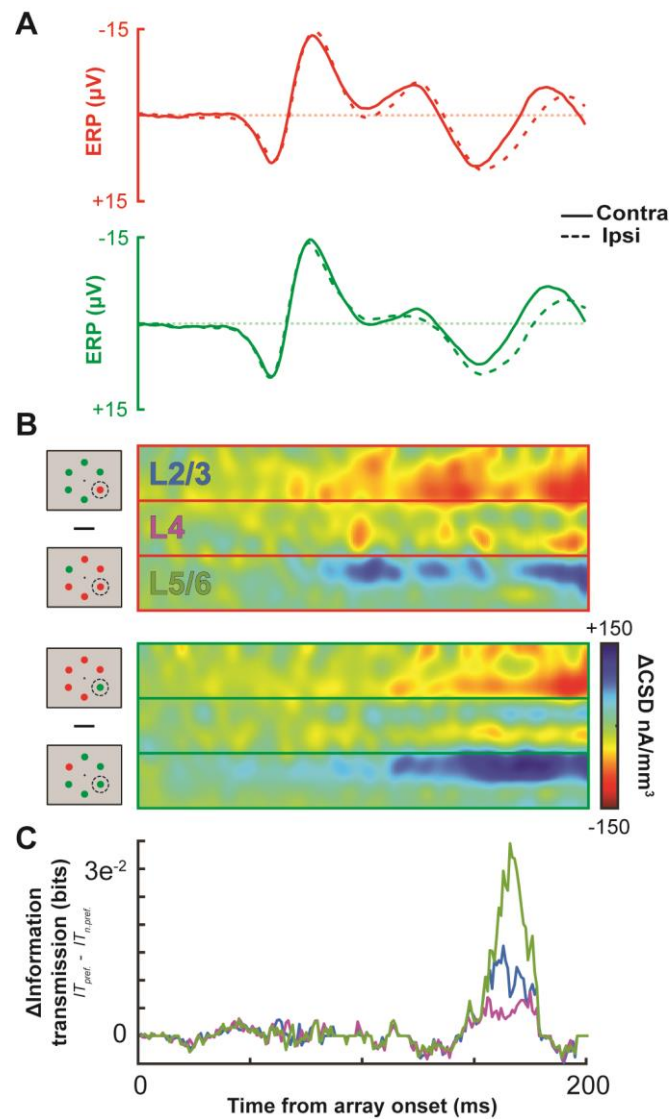

716  
717  
718  
719  
720  
721  
722

**Figure S4.** Single session example (monkey Ca) of the observed difference in information transmission depending on columnar color preference. (A) Extracranial event-related potential averaged across correctly performed trials (n=2992) for a single session with the target stimulus presented contralateral to the recording electrode (solid line;  $n_{red} = 742$ ,  $n_{green} = 766$ ) or ipsilateral to the recording electrode (dashed line;  $n_{red} = 752$ ,  $n_{green} = 732$ ) for trials where the target is red (top) of green (bottom). (B) Average difference in CSD profile for correctly performed trials between target present in RF and distractor present in RF for red item in RF trials (top) and green item in RF trials (bottom). (C) Difference in information transmission between the preferred color and the non-preferred color for the same single session as in panels A and B.

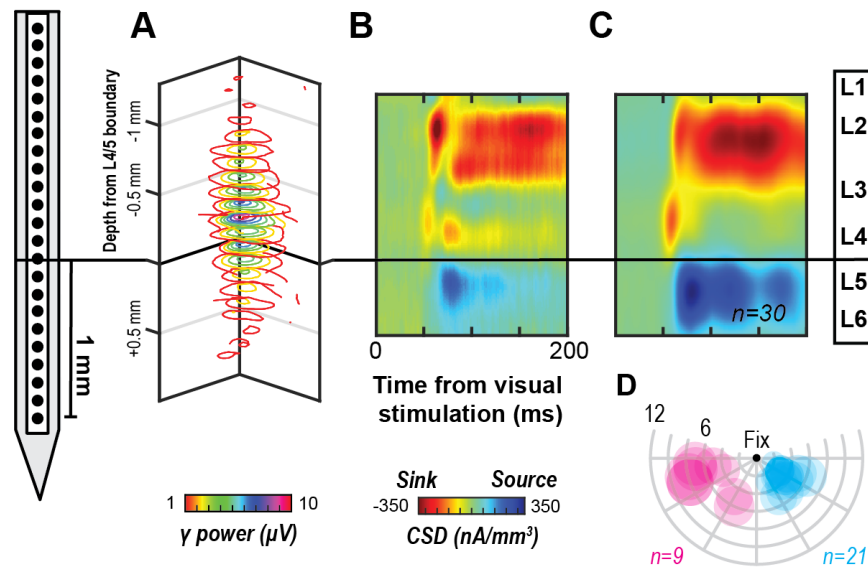

723  
724 **Figure S5.** (A) Representative RFs across recording sites of a single array penetration. RFs across recording sites (z axis) are well aligned, indicating  
725 perpendicular penetration. Electrode positioned at left for reference. (B) CSD profile for the same session as (C). The initial sink following visual  
726 stimulation was used as a functional marker to determine the layer 4/5 boundary. Current sinks are indicated in red and sources in blue. The black  
727 horizontal line indicates the bottom of the granular input sink. Data are smoothed along depth and across time for visualization purposes. (C) Mean  
728 CSD profile following alignment of the 30 sessions (21, monkey C; 9, monkey H). Formatting identical to (B). (D) Columns' RF locations across  
729 sessions and monkeys (cyan, monkey C; magenta, monkey H). RF centers determined online, and diameters estimated from previous reports (see  
730 V4 receptive field mapping and electrode orthogonality for details). Concentric circles indicate eccentricities in dva. Radial lines indicate angular  
731 positions relative to central fixation (black dot at top center).
